# Supplementary material for: Synthesis, structure–property and flame retardancy relationships of polyphosphonamide and its application on epoxy resins
Source: Royal Society of Chemistry journal article supplement (doi:10.1039/c7ra08318a), 2017-01-01
Supplement: c7ra08318a1.pdf [file c7ra08318a1.pdf]

## Supplementary Information

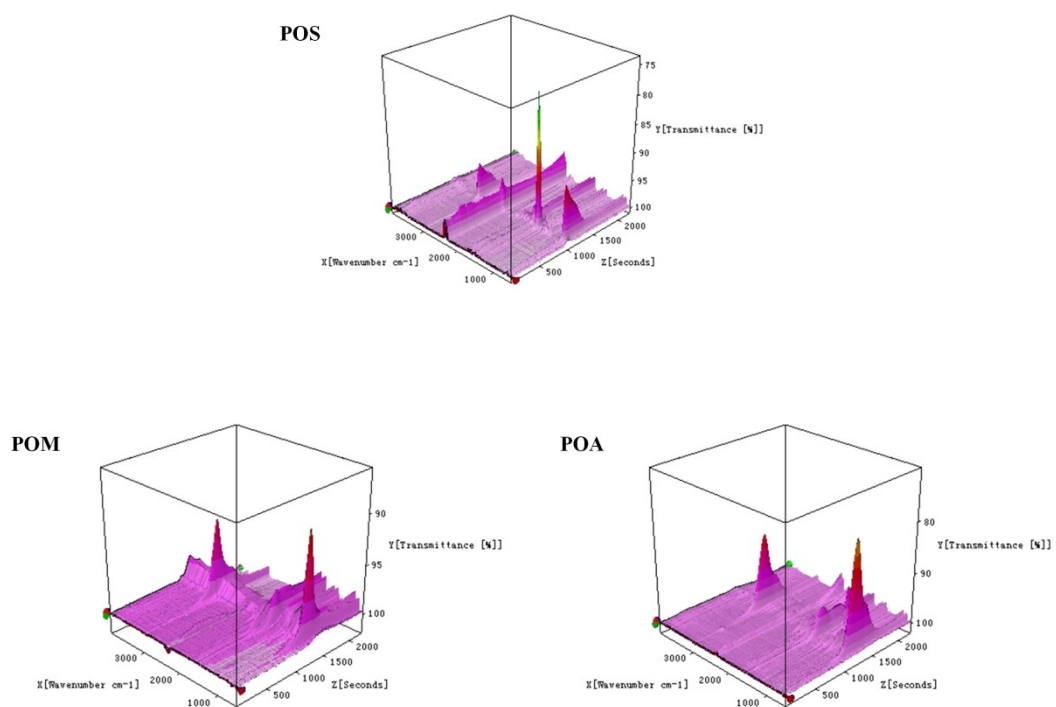

**SI Fig. 1.** TGA-FTIR 3D spectra of pyrolysis gases during thermal degradation of POS, POM and POA.
